# Supplementary material
Source: HighWire-hosted journal article supplement (https://erj.ersjournals.com/content/57/2/2004601)
Supplement: inline-supplementary-material-1 [file inline-supplementary-material-1.pdf]

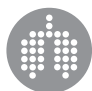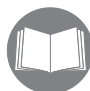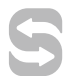

SHAREABLE PDF

# The BEAT-PCD (Better Experimental Approaches to Treat Primary Ciliary Dyskinesia) Clinical Research Collaboration

Myrofora Goutaki <sup>1,2</sup>, Suzanne Crowley <sup>3</sup>, Eleonora Dehlink<sup>4</sup>, René Gaupmann<sup>4</sup>, Katie L. Horton<sup>5</sup>, Panayiotis Kouis <sup>6</sup>, Yin Ting Lam<sup>1</sup>, Niki T. Loges<sup>7</sup>, Jane S. Lucas <sup>5,8</sup>, Jobst F. Roehmel <sup>9</sup> and Amelia Shoemark <sup>10,11</sup>  
on behalf of the BEAT-PCD Clinical Research Collaboration

**Affiliations:** <sup>1</sup>Institute of Social and Preventive Medicine, University of Bern, Bern, Switzerland. <sup>2</sup>Paediatric Respiratory Medicine, Children's University Hospital of Bern, University of Bern, Bern, Switzerland. <sup>3</sup>Paediatric Dept of Allergy and Lung Diseases, Oslo University Hospital, Oslo, Norway. <sup>4</sup>Division of Pediatric Pulmonology, Allergology, and Endocrinology, Dept of Pediatrics and Adolescent Medicine, Medical University of Vienna, Vienna, Austria. <sup>5</sup>School of Clinical and Experimental Sciences, University of Southampton Faculty of Medicine, Southampton, UK. <sup>6</sup>Respiratory Physiology Laboratory, Medical School, University of Cyprus, Nicosia, Cyprus. <sup>7</sup>Dept of General Pediatrics, University Hospital Münster, Münster, Germany. <sup>8</sup>Primary Ciliary Dyskinesia Centre, NIHR Biomedical Research Centre, University Hospital Southampton NHS Foundation Trust, Southampton, UK. <sup>9</sup>Dept of Pediatric Pulmonology, Immunology and Critical Care Medicine, Charité-Universitätsmedizin, Berlin, Germany. <sup>10</sup>Scottish Centre for Respiratory Research, University of Dundee, Dundee, UK. <sup>11</sup>PCD diagnostic centre, Paediatric Dept, Royal Brompton Hospital, London, UK.

**Correspondence:** Myrofora Goutaki, Institute of Social and Preventive Medicine, University of Bern, Mittelstrasse 43, 3012 Bern, Switzerland. E-mail: myrofora.goutaki@ispm.unibe.ch

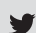

@ERSpublications

The BEAT-PCD ERS CRC is a large multidisciplinary network of researchers and healthcare professionals aiming to advance clinical and translational research in different areas of primary ciliary dyskinesia building upon previous collaborative initiatives <https://bit.ly/39h3veZ>

**Cite this article as:** Goutaki M, Crowley S, Dehlink E, *et al.* The BEAT-PCD (Better Experimental Approaches to Treat Primary Ciliary Dyskinesia) Clinical Research Collaboration. *Eur Respir J* 2021; 57: 2004601 [<https://doi.org/10.1183/13993003.04601-2020>].

This single-page version can be shared freely online.

The need for collaborative research networks as an effective way forward to improve diagnosis and care of rare inherited diseases is constantly highlighted and primary ciliary dyskinesia (PCD) is no exception. PCD affects 1 in 10 000 people and is genetically and clinically heterogeneous. Dysfunction of motile cilia, caused by defects in one of more than 50 genes, leads to poor mucociliary clearance and progressive upper and lower respiratory disease. Clinical symptoms include neonatal respiratory distress, chronic lung disease with bronchiectasis, rhinosinusitis and hearing impairment, and also infertility and laterality defects. 50% of patients have situs inversus and 6–12% have other defects, such as congenital cardiac disease [1, 2]
